# Supplementary material
Source: PubMed Central journal article supplement (PMC2533135)
Supplement: NIHMS61551-supplement-si20060926_095.pdf [file NIHMS61551-supplement-si20060926_095.pdf]

## Supporting Information Available

**Table S1.** Comparison between Vibrational Frequencies<sup>a</sup> of Tetrahydrobiopterin Calculated by Density Functional Theory and Molecular Mechanics (using the OPLS Force Field).

| Normal mode | QM <sup>b</sup> | MM <sup>c</sup> | D <sup>d</sup> | % <sup>e</sup> | Normal mode | QM   | MM   | D   | %   |
|-------------|-----------------|-----------------|----------------|----------------|-------------|------|------|-----|-----|
| 1           | 33              | 41              | -7             | 23.7           | 46          | 1058 | 981  | 77  | 7.2 |
| 2           | 50              | 54              | -4             | 8.3            | 47          | 1077 | 1013 | 64  | 6.0 |
| 3           | 83              | 90              | -7             | 8.8            | 48          | 1083 | 1019 | 64  | 5.9 |
| 4           | 97              | 103             | -6             | 6.5            | 49          | 1114 | 1055 | 59  | 5.3 |
| 5           | 123             | 110             | 13             | 10.7           | 50          | 1146 | 1080 | 66  | 5.7 |
| 6           | 149             | 136             | 13             | 8.9            | 51          | 1179 | 1166 | 12  | 1.0 |
| 7           | 166             | 157             | 9              | 5.5            | 52          | 1209 | 1185 | 24  | 2.0 |
| 8           | 180             | 192             | -12            | 6.7            | 53          | 1215 | 1200 | 15  | 1.2 |
| 9           | 203             | 222             | -18            | 9.1            | 54          | 1246 | 1209 | 37  | 2.9 |
| 10          | 232             | 243             | -11            | 4.7            | 55          | 1255 | 1220 | 34  | 2.7 |
| 11          | 237             | 255             | -18            | 7.6            | 56          | 1270 | 1230 | 40  | 3.1 |
| 12          | 253             | 272             | -19            | 7.5            | 57          | 1273 | 1254 | 19  | 1.5 |
| 13          | 282             | 283             | -1             | 0.3            | 58          | 1298 | 1290 | 8   | 0.6 |
| 14          | 288             | 293             | -5             | 2.0            | 59          | 1306 | 1307 | -1  | 0.1 |
| 15          | 301             | 300             | 1              | 0.4            | 60          | 1315 | 1324 | -9  | 0.7 |
| 16          | 328             | 318             | 10             | 3.3            | 61          | 1322 | 1352 | -30 | 2.3 |
| 17          | 338             | 337             | 1              | 0.3            | 62          | 1328 | 1366 | -37 | 2.8 |
| 18          | 391             | 359             | 32             | 8.2            | 63          | 1349 | 1379 | -30 | 2.2 |
| 19          | 404             | 386             | 18             | 4.6            | 64          | 1359 | 1403 | -44 | 3.2 |
| 20          | 415             | 406             | 9              | 2.3            | 65          | 1404 | 1404 | 0   | 0   |
| 21          | 462             | 420             | 42             | 9.2            | 66          | 1432 | 1444 | -12 | .8  |
| 22          | 486             | 435             | 50             | 10.4           | 67          | 1438 | 1467 | -29 | 2.0 |

|                   |      |     |     |      |    |      |      |      |     |
|-------------------|------|-----|-----|------|----|------|------|------|-----|
| 23                | 498  | 442 | 56  | 11.4 | 68 | 1448 | 1481 | -33  | 2.3 |
| 24                | 511  | 465 | 46  | 8.9  | 69 | 1450 | 1504 | -54  | 3.7 |
| 25                | 526  | 501 | 25  | 4.8  | 70 | 1462 | 1528 | -66  | 4.5 |
| 26                | 545  | 529 | 16  | 3.1  | 71 | 1510 | 1548 | -38  | 2.5 |
| 27                | 554  | 544 | 10  | 1.8  | 72 | 1557 | 1597 | -39  | 2.5 |
| 28                | 559  | 556 | 3   | 0.6  | 73 | 1591 | 1607 | -16  | 1.0 |
| 29                | 611  | 606 | 5   | 0.8  | 74 | 1607 | 1705 | -97  | 6.0 |
| 30                | 645  | 619 | 26  | 4.0  | 75 | 1668 | 1799 | -131 | 7.9 |
| 31                | 660  | 634 | 26  | 4.0  | 76 | 2850 | 2873 | -23  | .8  |
| 32                | 685  | 676 | 9   | 1.2  | 77 | 2892 | 2921 | -29  | 1.0 |
| 33                | 686  | 702 | -17 | 2.5  | 78 | 2912 | 2943 | -31  | 1.1 |
| 34                | 706  | 733 | -27 | 3.8  | 79 | 2916 | 2948 | -32  | 1.1 |
| 35                | 737  | 773 | -36 | 4.7  | 80 | 2924 | 2950 | -26  | .9  |
| 36                | 811  | 791 | -20 | 2.5  | 81 | 2981 | 2972 | 9    | .3  |
| 37                | 849  | 828 | 21  | 2.5  | 82 | 2989 | 2977 | 12   | .4  |
| 38                | 862  | 845 | 16  | 1.9  | 83 | 3016 | 2979 | 37   | 1.2 |
| 39                | 900  | 874 | 26  | 2.9  | 84 | 3380 | 3380 | 0    | 0   |
| 40                | 948  | 897 | 51  | 5.4  | 85 | 3437 | 3455 | -18  | 0.5 |
| 41                | 988  | 917 | 71  | 7.2  | 86 | 3468 | 3504 | -37  | 1.1 |
| 42                | 1019 | 921 | 98  | 9.6  | 87 | 3507 | 3507 | 0    | 0   |
| 43                | 1024 | 956 | 68  | 6.6  | 88 | 3548 | 3578 | -30  | 0.8 |
| 44                | 1034 | 963 | 71  | 6.8  | 89 | 3552 | 3582 | -30  | 0.8 |
| 45                | 1055 | 980 | 75  | 7.1  | 90 | 3686 | 3677 | -8   | 0.2 |
| RMSD <sup>f</sup> |      |     | 38  |      |    |      |      |      |     |
| MAX <sup>g</sup>  |      |     | 131 |      |    |      |      |      |     |

<sup>a</sup> In cm<sup>-1</sup>.

<sup>b</sup> Calculated by the density functional theory (B3LYP/6-31+G(d,p)) with the Gaussian98 program <sup>1</sup>.

<sup>c</sup> Calculated by molecular mechanics using the OPLS force field parameters determined in this work. The calculations were performed with the Gromacs program <sup>2</sup>.

<sup>d</sup> Difference between the same normal mode calculated by quantum mechanics and molecular mechanics (in  $\text{cm}^{-1}$ ).

<sup>e</sup> The percent difference of the same normal mode calculated by quantum mechanics and molecular mechanics (in  $\text{cm}^{-1}$ ).

<sup>f</sup> Root-mean square deviation.

<sup>g</sup> Maximum difference.
